# Supplementary material for: Restoration of miR-340 controls pancreatic cancer cell CD47 expression to promote macrophage phagocytosis and enhance antitumor immunity
Source: PubMed Central journal article supplement — J Immunother Cancer. 2020 Jun 4;8(1):e000253. doi: 10.1136/jitc-2019-000253 (PMC7279671; doi:10.1136/jitc-2019-000253), 2020-06-04
Supplement: jitc-2019-000253supp001.pdf [file jitc-2019-000253supp001.pdf]

1 **Restoration of miR-340 controls pancreatic cancer cell *CD47* expression to promote**  
2 **macrophage phagocytosis and enhance antitumor immunity**

3 Qing Xi<sup>1,#</sup>, Jiyou Zhang<sup>1,#</sup>, Guangze Yang<sup>1,#</sup>, Lijuan Zhang<sup>1</sup>, Ying Chen<sup>2</sup>, Chengzhi Wang<sup>1</sup>,  
4 Zimu Zhang<sup>1</sup>, Xiangdong Guo<sup>1</sup>, Jingyi Zhao<sup>2</sup>, Zhenyi Xue<sup>1</sup>, Yan Li<sup>1</sup>, Qi Zhang<sup>3</sup>, Yurong Da<sup>1</sup>,  
5 Li Liu<sup>4</sup>, Zhi Yao<sup>1</sup> and Rongxin Zhang<sup>2,1,\*</sup>

6 **Supplemental Materials and Methods**

7 **Small interfering RNAs and transfection**

8 The mouse miR-340 mimics and control-mimics were purchased from RiboBio (Guangzhou, China).  
9 The cells were treated with mimics (final concentration, 25 nM) using Lipofectamine RNAiMAX  
10 (Invitrogen, Carlsbad, CA, USA) according to the manufacturer's instructions.

11 **Lentiviral constructs and infection**

12 MiR-340 overexpression lentivirus vector pGLV3-H1-miR-340-GFP-Puro (GenePharma) or pGLV3-  
13 H1-GFP-Puro empty lentiviral vector (miR-NC) (GenePharma) were transfected into HEK293T cells  
14 with the packaging vectors psPAX2 (Addgene plasmid 12260) and pMD2.G (Addgene plasmid 12259)  
15 using PEI (Polyscience). After 48 h and 72 h, the culture medium was collected and centrifuged at  
16 2000 × g for 5 min to remove cell debris. The supernatant was filtered; PEG 8000 was added into the  
17 supernatant, then incubated overnight at 4°C with shaking. The next day, the samples were centrifuged  
18 at 4000 rpm/min for 30 min at 4°C and resuspended for lentivirus precipitation. The Panc02 cells were  
19 infected with lentivirus collected above and selected by puromycin.

20 **Quantitative real-time PCR**

21 The total RNA was extracted using TRIzol reagent (Invitrogen, Carlsbad, USA), and cDNA was  
22 synthesized with M-MLV reverse transcriptase (Invitrogen, USA). The primers were synthesized at  
23 Genewiz (Suzhou, China). Quantitative real-time PCR (qRT-PCR) was performed using the SYBR  
24 Green mix (DBI Bioscience, Germany). The reactions were performed in triplicate on an ABI PRISM

25 7500 Fast Real Time PCR System (Applied Biosystems Inc., USA). The fold changes were calculated  
26 using the  $2^{-\Delta\Delta C_t}$ . The following primers were used: miR-340 primers: 5'-  
27 GCCGTTATAAAGCAATGAGA-3' and 5'- GTGCAGGGTCCGAGGT -3'; *CD47* primers: 5'-  
28 TGC GGTT CAGCTCAACTACTG -3' and 5'- GCTTTGCGCCTCCACATTAC -3'; *GAPDH*  
29 primers :5'-CCATGTTTGTGATGGGTGTGAACCA -3' and 5'-  
30 ACCAGTGGATGCAGGGATGATGTTC -3'.

### 31 **Western blot analysis**

32 Whole cell lysates were prepared using RIPA lysis buffer in the presence of 1% phosphatase inhibitor  
33 cocktail and 1mM PMSF. The protein was subjected to SDS-PAGE after boiling for 10 min in 1 ×  
34 SDS loading buffer. Proteins were electrophoresed at 80 V for 30 min and followed by 110V for 90  
35 min, then transferred to a PVDF membrane (Millipore, USA) at 180 mA for 90 min. After blocked  
36 with 5% nonfat milk at room temperature for 1 h, the membranes were incubated with the primary  
37 antibodies overnight at 4°C. The anti-*GAPDH* antibody was purchased from Sungene (China, 1:1000).  
38 The anti-*CD47* antibody was purchased from Abclonal (China, 1:1000). After incubating with  
39 horseradish peroxidase-conjugated secondary antibody (CST, USA, 1:2000), Immunoreactive bands  
40 were visualized using the ECL Western Blotting Detection System (Millipore, USA).

### 41 **Cell apoptosis and proliferation assays**

42 For the analysis of apoptosis, cancer cells were double-stained with Annexin V-APC Apoptosis  
43 Analysis Kit (Sungene, China). In detail, the cells were resuspended in 100 μL buffer with 5 μL  
44 annexin V-APC for 10 min and then incubated with 5μL 7-AAD or PI for 5min at room temperature in  
45 the dark. A total of 500μL buffer was added, and the cells were immediately analyzed using  
46 FACSCanto II flow cytometer (BD, USA). A total of 10,000 cells per sample were acquired. For the  
47 analysis of proliferation, the cells were seeded in 96-well culture plates (2000 cells per well) and  
48 incubated for appropriate time. 10 μL Cell Counting Kit-8 (CCK-8, Dojindo, Kumamoto, Japan)  
49 solution were added to the medium, and cells were incubated for 4 h in a humidified atmosphere with  
50 5% CO<sub>2</sub>, the absorbance at 450 nm were measured using a microplate reader.

**51 Wound healing assay**

52 The cancer cells were seeded into 6-well plates and cultured in DMEM containing 10% FBS. After  
53 reaching approximately 95% confluence, linear scratches were made using a 10 $\mu$ L micropipette tip.  
54 The cells were further cultured in DMEM containing 1% FBS. Wound width was photographed using  
55 optical microscope (20 $\times$ ) at 0 h and 24 h. To evaluate wound closure, three randomly selected points  
56 along each wound were marked. The measurements were obtained by measuring the distance between  
57 the wound edges using Image Pro Plus 6.0 software.

**58 Assessment of cell proliferation using VitroGel 3D**

59  $2 \times 10^4$  miR-NC or miR-340 overexpression Panc02 cells were plated on a semi-solid polymer called  
60 VitroGel 3D (TheWell Bioscience, USA). The working solution of VitroGel 3D in DMEM was made  
61 by mixing VitroGel 3D: PBS at 1:3 ratio, then mixed with 10% FBS DMEM at 4:1 ratio. The cells in  
62 VitroGel 3D were added into a 96-well plate at 100  $\mu$ L/well; plate was incubated for 20 minutes at  
63 37  $^{\circ}$ C to turn into hydrogels quickly, then 100  $\mu$ L of 10% FBS DMEM media was added on top of the  
64 VitroGel 3D. The ratios used here allow VitroGel 3D to be kept in a semi-solid state. 10  $\mu$ L CCK-8  
65 solution were added into the medium, and the cells were incubated for 4 h in a humidified atmosphere  
66 with 5% CO<sub>2</sub>, finally measured at 450 nm with a microplate reader.

**67 3D invasion assay and 3D migration assay**

68 For 3D invasion assay, the 24-well cell culture inserts (Merck Millipore) were coated with 100  $\mu$ L  
69 working solution of VitroGel 3D and incubated at 37 $^{\circ}$ C for 20 minutes to form hydrogels, 600 $\mu$ L  
70 DMEM medium with 30% FBS were added into the basal chamber of the unit.  $2 \times 10^5$  miR-NC or miR-  
71 340 overexpression Panc02 cells were suspended in 0.1% FBS medium and plated on top of the  
72 hydrogels in the upper chamber and incubated for 48 h at 37 $^{\circ}$ C, then use a cotton swab to remove cells  
73 in the upper chamber, and dyed with crystal violet for analysis. For 3D Migration assay, the migration  
74 assay was performed in a similar way as the 3D invasion assay except that the 24-well cell culture  
75 inserts were not coated with VitroGel 3D.

76

77 **Additional Figures and Legends:**78 **Figure S1: The gating plan of phagocytosis in FACS plots.**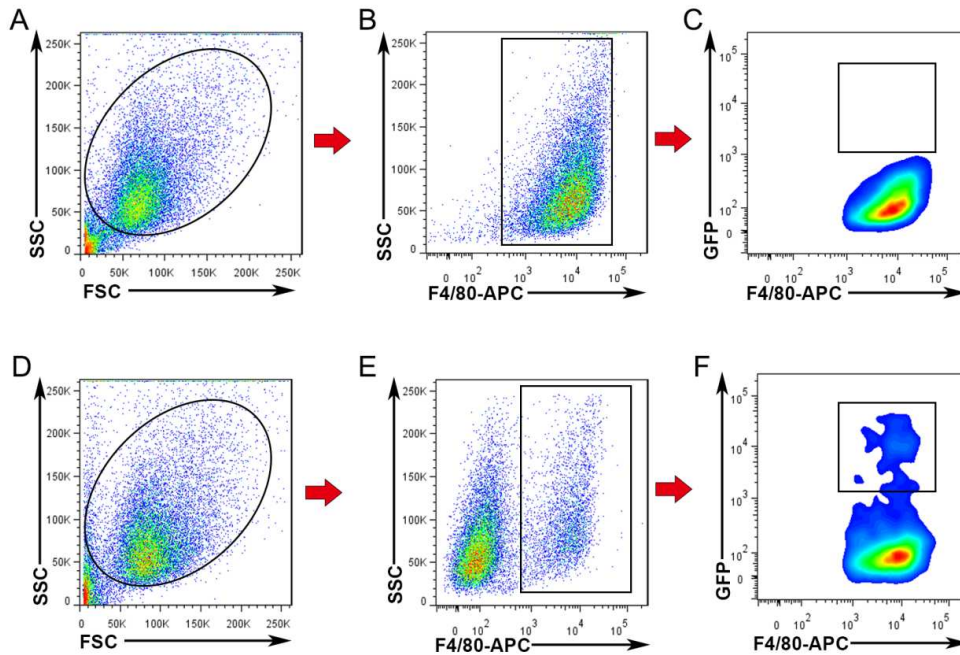

79

80 **Figure S1:** In the FACS plots, the macrophages (F4/80<sup>+</sup>) were selected firstly, then the macrophages  
81 engulfed GFP<sup>+</sup> cancer cells (F4/80<sup>+</sup>GFP<sup>+</sup>) were marked. (A-C) The gating of phagocytosis in  
82 macrophages alone. (D-F) The gating of phagocytosis in macrophage co-cultured with pancreatic  
83 cancer cells.

84

85 **Figure S2: Representative images of phagocytosis of tumor cells by macrophages in**  
86 **immunofluorescence staining.**

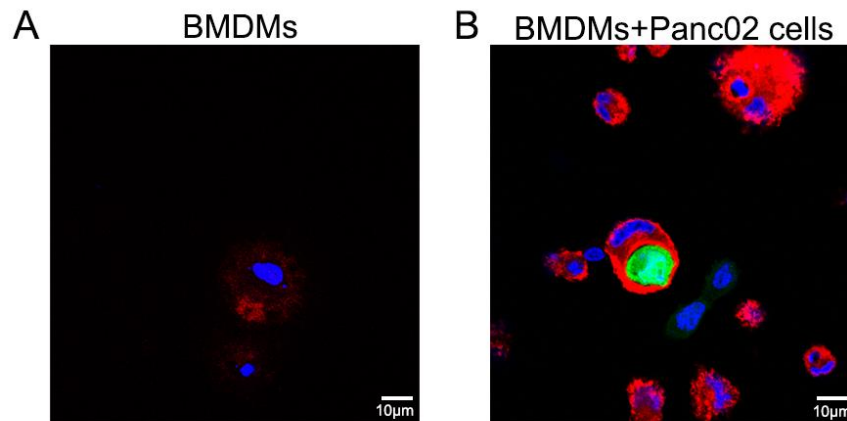

87

88 **Figure S2.** A: Representative image of BMDMs alone. B: Representative image of phagocytosis of  
89 Panc02 cells by macrophages in co-culture system, the phagocytosis was inspected using a Fluoview  
90 FV1000 Laser Scanning Confocal Microscope. Magnification:100×. Macrophages were stained in red  
91 (F4/80<sup>+</sup>), cancer cells were green (GFP<sup>+</sup>), and nuclei were blue (DAPI<sup>+</sup>).
